# Supplementary material for: New Trends for Antimalarial Drugs: Synergism between Antineoplastics and Antimalarials on Breast Cancer Cells
Source: MDPI journal article supplement (doi:10.3390/biom10121623), 2020-12-01
Supplement: s1 [file s1]

## Supplementary Materials

### New trends for antimalarial drugs: synergism between antineoplastics and antimalarials on breast cancer cells

Diana Duarte <sup>1,2</sup> and Nuno Vale <sup>3,\*</sup>

<sup>1</sup> OncoPharma Research Group, Center for Health Technology and Services Research (CINTESIS), Rua Dr. Plácido da Costa, 4200-450 Porto, Portugal

<sup>2</sup> Faculty of Pharmacy of University of Porto, Rua Jorge Viterbo Ferreira, 228, 4050-313 Porto, Portugal

<sup>3</sup> Faculty of Medicine, University of Porto, Al. Prof. Hernâni Monteiro, 4200-319 Porto, Portugal

\* Correspondence: nunovale@med.up.pt;

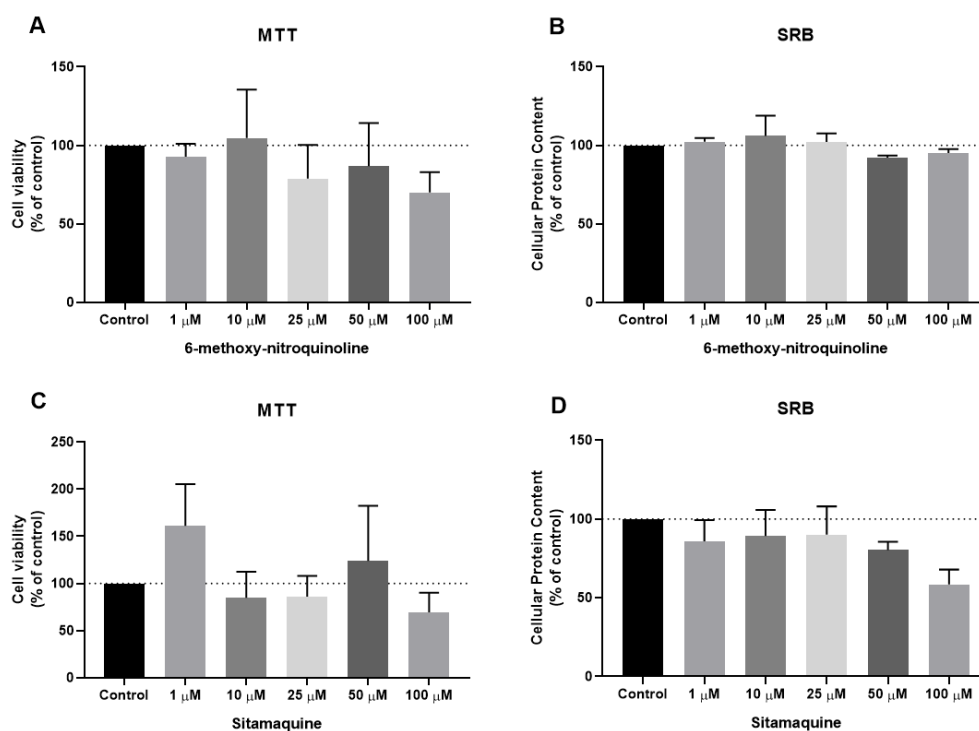

**Figure S1.** Effects of 6-methoxy-nitroquinoline (A and B) and sitamaquine (C and D) on MCF-7 cells. Cells were cultured in the presence of increasing concentrations of each drug. After 48 h MTT and SRB assays were performed to measure cellular viability as well as protein content. Values are expressed in percentage and represent means  $\pm$  SEM. Each experiment was done three times independently (n=3).

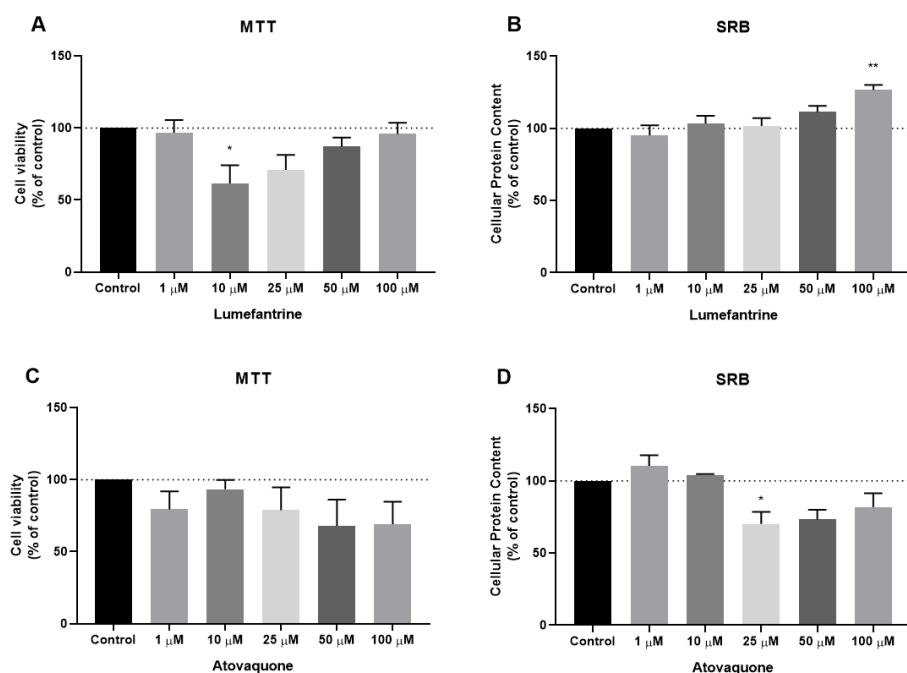

**Figure S2.** Effects of lumefantrine (A and B) and atovaquone (C and D) on MCF-7 cells. Cells were cultured in the presence of increasing concentrations of each drug. After 48 h MTT and SRB assays were performed to measure cellular viability as well as protein content. Values are expressed in percentage and represent means  $\pm$  SEM. Each experiment was done three times independently (n=3); \*statistically significant vs. control at  $p < 0.05$ . \*\*statistically significant vs. control at  $p < 0.01$ .

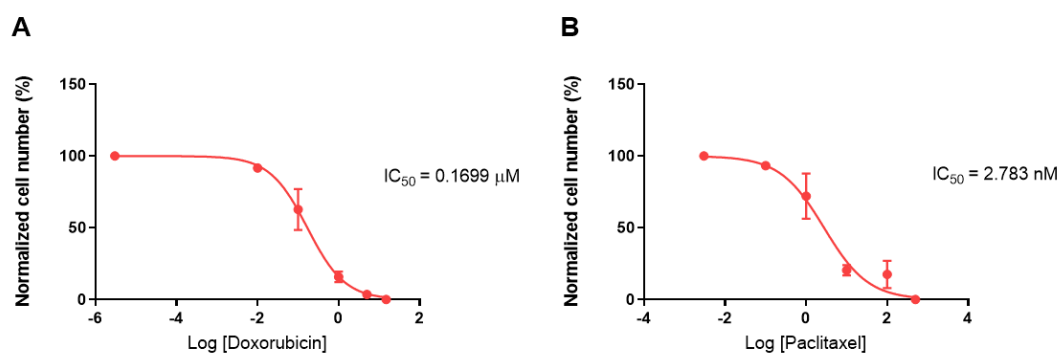

**Figure S3.** Concentration-response curves of DOX (A) and PTX (B) on MCF-7 cells based on results obtained by MTT assay. The results represent the mean  $\pm$  SEM of three independent experiments performed in triplicate.

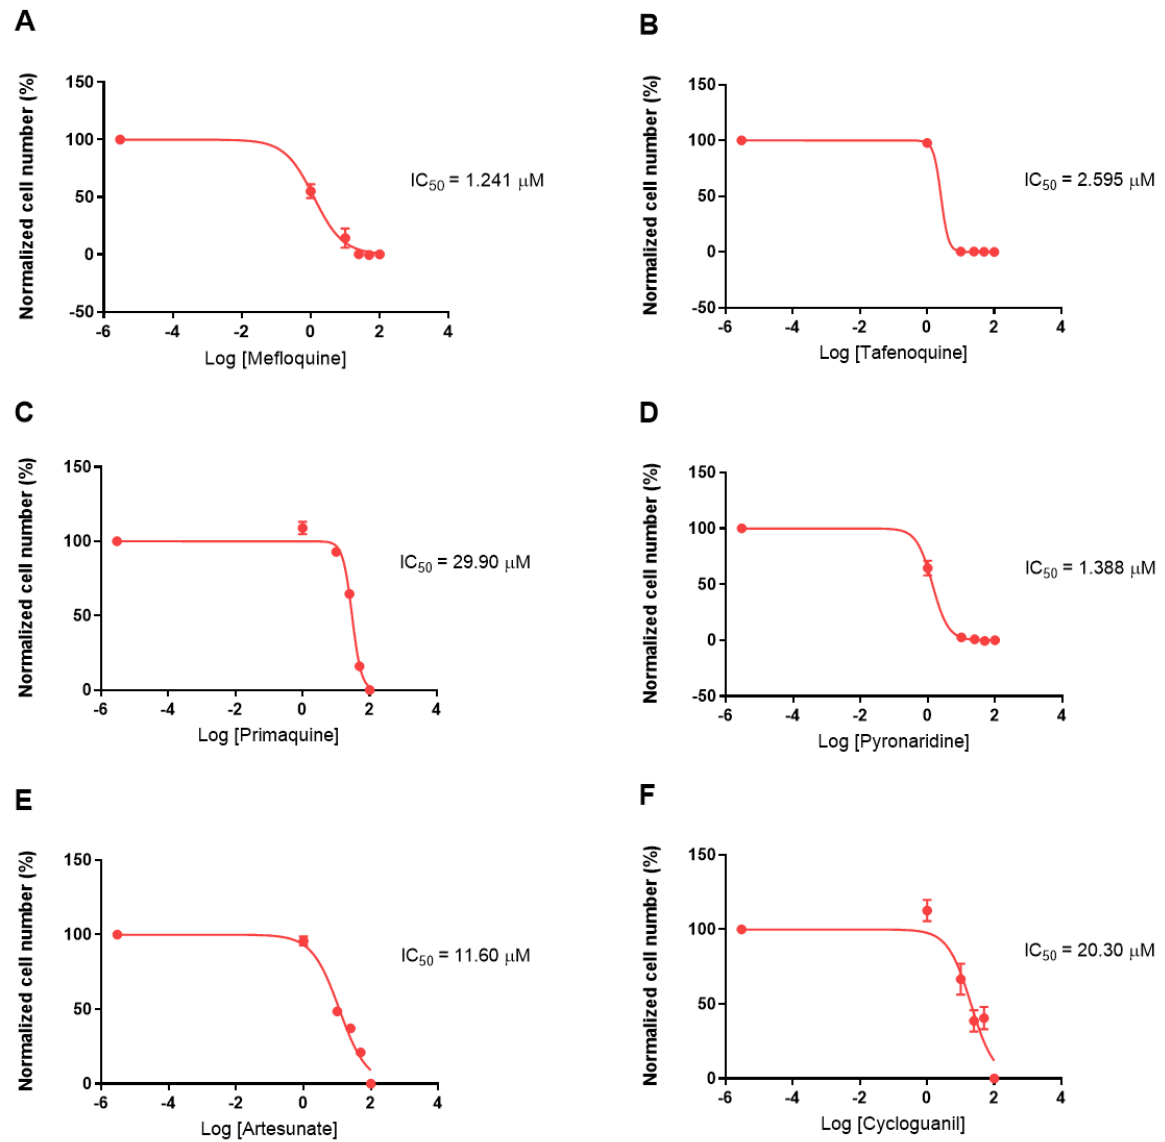

**Figure S4.** Concentration-response curves of mefloquine (A), tafenoquine (B), primaquine (C), pyronaridine (D), artesunate (E) and cycloguanil (F) on MCF-7 cells based on results obtained by MTT assay. The results represent the mean  $\pm$  SEM of three independent experiments performed in triplicate.

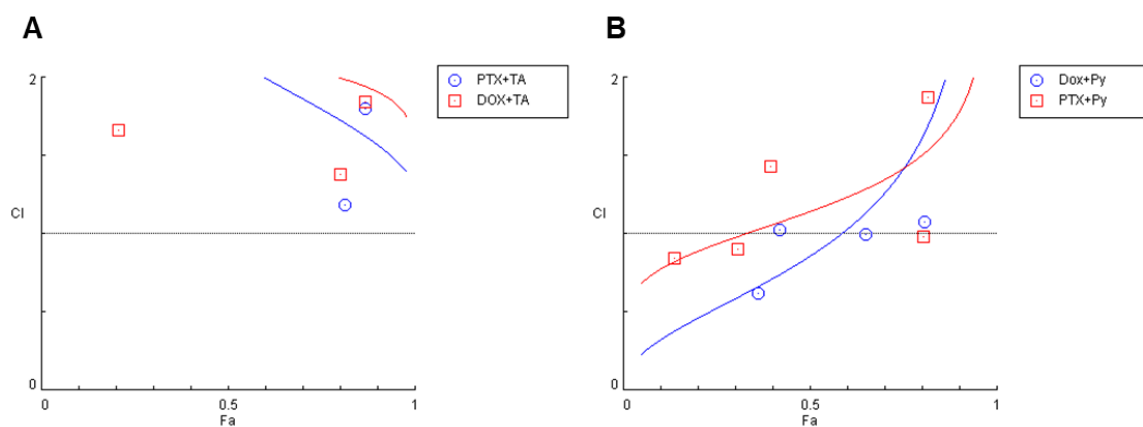

**Figure S5.** Chou-Talalay method Fa-CI plot of DOX/PTX and tafenoquine (**A**) and pyronaridine (**B**). CI was plotted on y-axis as a function of effect level (Fa) on the x-axis to assess drug synergism.  $CI < 1$ ,  $CI = 1$  and  $CI > 1$  indicate synergism, additivity, and antagonism, respectively.
